# Supplementary material for: Leucocalocybe mongolica inoculation enhances rice growth by reallocating resources from flavonoid defense to development via MYB/bHLH/WRKY networks
Source: Front Plant Sci. 2025 Sep 3;16:1653445. doi: 10.3389/fpls.2025.1653445 (PMC12442037; doi:10.3389/fpls.2025.1653445)
Supplement: Supplementary Table 1 — Raw Flavonoid data. [file Table1.xlsx]

## Sheet: Table S1 (Raw flavonoids data)
Compounds	Q1 (Da)	Q3 (Da)	Molecular weight (Da)	Formula	Ionization model	Class I	Class II	CAS	LCK-1	LCK-2	LCK-3	L10-1	L10-2	L10-3	L30-1	L30-2	L30-3	L50-1	L50-2	L50-3	cpd_ID	kegg_map	L10_vs_LCK_VIP	L10_vs_LCK_P-value	L10_vs_LCK_Fold_Change	L10_vs_LCK_Log2FC	L10_vs_LCK_Type	L30_vs_LCK_VIP	L30_vs_LCK_P-value	L30_vs_LCK_Fold_Change	L30_vs_LCK_Log2FC	L30_vs_LCK_Type	L50_vs_LCK_VIP	L50_vs_LCK_P-value	L50_vs_LCK_Fold_Change	L50_vs_LCK_Log2FC	L50_vs_LCK_Type
1,4'-Di-Tricin-(guaiacylglycerol)ether	839.21	331.08	838.211	C44H38O17	[M+H]+	Flavonoids	Flavones	-	240550	241799	243643	78806.4	69928.4	72678	40430.9	41868.7	52873.6	40760.2	42067.3	42409.4	-	-	1.34186	5.68754e-05	0.30498	-1.71321	down	1.29868	0.000214783	0.186191	-2.42514	down	1.27317	1.62658e-07	0.172505	-2.53529	down
2',4'-Dihydroxy-2,3',6'-Trimethoxychalcone*	331.12	197.04	330.11	C18H18O6	[M+H]+	Flavonoids	Chalcones	100079-39-8	12161.5	8923.71	12282.5	76106.7	80409	59484.9	50970.9	31815.6	71342.1	39292.5	46361.2	31643	-	-	1.32963	0.00920879	6.47335	2.69451	up	1.2329	0.0705173	4.6191	2.20761	up	1.23716	0.0172471	3.51528	1.81364	up
2,4'-Di-Tricin-(guaiacylglycerol)ether	839.21	331.08	838.211	C44H38O17	[M+H]+	Flavonoids	Flavones	-	133002	127598	121011	90250	82182.8	91589.5	44803.1	55754.4	55878.2	54682.8	48324.7	56273.2	-	-	-	-	-	-	-	1.28568	0.000121844	0.409934	-1.28654	down	1.26352	0.000133955	0.417389	-1.26054	down
3',5',5,7-Tetrahydroxy-4'-methoxyflavanone-3'-O-glucoside	481.13	319.05	480.127	C22H24O12	[M+H]+	Flavonoids	Flavones	-	387377	402198	356039	186743	273124	301629	205630	272413	208766	155020	95679.9	109239	-	-	-	-	-	-	-	-	-	-	-	-	1.23405	0.000459907	0.314189	-1.6703	down
3'-O-Methyltricetin-5-O-glucoside*	479.12	317.06	478.111	C22H22O12	[M+H]+	Flavonoids	Flavones	-	1.14942e+07	9.30393e+06	9.63099e+06	7.94913e+06	9.97244e+06	1.00647e+07	5.19934e+06	6.12972e+06	6.5508e+06	4.85239e+06	3.08393e+06	4.34873e+06	-	-	-	-	-	-	-	-	-	-	-	-	1.20906	0.0027301	0.403726	-1.30855	down
3,4'-Di-Tricin-(guaiacylglycerol)ether	839.21	331.08	838.211	C44H38O17	[M+H]+	Flavonoids	Flavones	-	143230	139432	128944	88297.1	78439.2	74930	56859.2	82175.2	51822.6	51918.6	56899.7	51363.4	-	-	-	-	-	-	-	1.22477	0.00715508	0.463689	-1.10877	down	1.26751	0.000729662	0.389163	-1.36155	down
3,5,6,7,8,4'-Hexamethoxyflavone	403.14	373.09	402.132	C21H22O8	[M+H]+	Flavonoids	Flavones	34170-18-8	3.55905e+06	3.63899e+06	3.65728e+06	3.43065e+06	3.42355e+06	3.38924e+06	3213.02	4693.71	7423.9	3.4536e+06	3.50511e+06	3.43361e+06	-	-	-	-	-	-	-	1.30158	6.78826e-05	0.00141227	-9.46777	down	-	-	-	-	-
3,5,7,2'-Tetrahydroxyflavone; Datiscetin	285.04	133.03	286.048	C15H10O6	[M-H]-	Flavonoids	Flavones	480-15-9	58763.7	57602.6	54689.3	23661.2	29882.3	25347.9	30343.9	30834.2	35078.9	35016.9	30387.9	37566.9	C10036	-	1.32187	0.000386157	0.461203	-1.11653	down	-	-	-	-	-	-	-	-	-	-
3,5,7-Trihydroxyflavanone (Pinobanksin)*	271.061	151.003	272.068	C15H12O5	[M-H]-	Flavonoids	Flavanonols	548-82-3	15366.6	7597.2	12563.1	22136.9	31538.8	27229.8	11011	17155.4	12967.3	10937.6	12871.2	13930.1	C09826	ko00941	1.18038	0.0138281	2.2773	1.18733	up	-	-	-	-	-	-	-	-	-	-
4-C-Glucose-1,3,6-trihydroxy-7-methoxyxanthone	435.09	345	436.101	C20H20O11	[M-H]-	Flavonoids	Other Flavonoids	-	108333	95474.4	139436	42968.6	53090.8	30044.2	61157.5	43026.5	41888.1	20390.6	30064.4	31113.2	-	-	1.25026	0.0161975	0.367389	-1.44462	down	1.21731	0.021959	0.425564	-1.23255	down	1.23776	0.0165991	0.23764	-2.07315	down
5,7,4'-Trihydroxy-6,8-dimethoxyisoflavone-7-O-galactoside-glucose-rhamnose	801.25	493.13	800.237	C35H44O21	[M+H]+	Flavonoids	Isoflavones	-	5.22868e+06	3.40007e+06	6.17915e+06	4.87463e+06	2.43396e+06	4.30009e+06	2.38095e+06	2.22193e+06	2.31969e+06	2.18349e+06	2.03207e+06	1.69501e+06	-	-	-	-	-	-	-	1.17182	0.0837998	0.467492	-1.09699	down	1.1688	0.0638644	0.39915	-1.325	down
5-Hydroxy-7,4'-dimethoxy-6,8-dimethylflavone; Eucalyptin	325.11	293.08	326.115	C19H18O5	[M-H]-	Flavonoids	Flavones	3122-88-1	51121.1	56495.1	56115.5	71672.9	78107.4	80067.7	102291	123537	108638	86813.8	84764.4	84677.4	-	-	-	-	-	-	-	1.28419	0.00825193	2.04277	1.03053	up	-	-	-	-	-
6-Methoxyquercetin-3-O-Xyloside*	465.1	333.07	464.096	C21H20O12	[M+H]+	Flavonoids	Flavonols	-	774649	859010	710398	413799	476528	401505	362117	422024	439210	330086	354412	395774	-	-	-	-	-	-	-	-	-	-	-	-	1.24944	0.00404485	0.460856	-1.11761	down
7-Hydroxy-2',5,8-Trimethoxyflavanone*	331.12	197.06	330.11	C18H18O6	[M+H]+	Flavonoids	Flavanones	-	16537.5	10428.9	8462.28	77788.3	64649.3	52392.4	49083.2	32601.3	78529.5	32199.8	40852.6	29613.1	-	-	1.299	0.0119178	5.49922	2.45923	up	1.19646	0.0859414	4.52216	2.17701	up	1.18113	0.00769161	2.89781	1.53496	up
7-O-Methylnaringenin	287.09	167.03	286.084	C16H14O5	[M+H]+	Flavonoids	Flavanones	-	51402.2	3635.89	2761.17	2.55168e+06	2.68826e+06	966356	502649	151144	301963	243418	346878	194316	-	-	1.26285	0.0655068	107.377	6.74654	up	1.13947	0.0953944	16.5358	4.04752	up	1.11627	0.0226088	13.5748	3.76286	up
8,11-dimethoxy-2h-[1,3]dioxolo[4,5-b]xanthen-10-one	301.07	286.05	300.063	C16H12O6	[M+H]+	Flavonoids	Other Flavonoids	-	622214	849784	843360	650428	579658	637065	369443	632497	365564	261226	264882	448670	-	-	-	-	-	-	-	-	-	-	-	-	1.15586	0.0108593	0.421005	-1.24809	down
Acacetin*	285.08	242.05	284.068	C16H12O5	[M+H]+	Flavonoids	Flavones	480-44-4	75164.6	73662.3	69932.6	186259	178764	76368.5	67669.6	38093.2	88835.5	57821.5	72846.8	53619.1	C01470	ko00944	-	-	-	-	-	-	-	-	-	-	-	-	-	-	-
Apigenin-6,8-di-C-glucoside-4'-O-glucoside	757.22	577.2	756.211	C33H40O20	[M+H]+	Flavonoids	Flavones	-	746048	638260	648303	371801	368103	300443	319859	340066	315570	461931	421341	426481	-	-	-	-	-	-	-	1.29049	0.0071719	0.479922	-1.05913	down	-	-	-	-	-
Cannabiscitrin*	481.1	319.05	480.09	C21H20O13	[M+H]+	Flavonoids	Flavonols	520-14-9	393939	402317	349187	275740	372536	313436	212308	204743	228576	134772	150718	135120	-	-	-	-	-	-	-	-	-	-	-	-	1.265	0.00234135	0.367203	-1.44535	down
Chrysoeriol 7-Sophorotrioside	787.23	301.07	786.222	C34H42O21	[M+H]+	Flavonoids	Flavones	-	136598	183226	179725	97001.8	101536	102747	88709.5	74835.4	51230.9	114373	106584	83132.1	-	-	-	-	-	-	-	1.19492	0.00875206	0.429939	-1.2178	down	-	-	-	-	-
Chrysoeriol-6,8-di-C-glucoside-4'-O-glucoside	787.23	625.17	786.222	C34H42O21	[M+H]+	Flavonoids	Flavones	-	3.57122e+06	3.84432e+06	3.87628e+06	1.72595e+06	2.04191e+06	1.80356e+06	1.52601e+06	1.35615e+06	1.36975e+06	1.5583e+06	1.6004e+06	1.61761e+06	-	-	1.32732	0.000149043	0.493402	-1.01916	down	1.29907	0.000167881	0.376548	-1.40909	down	1.27055	0.0014847	0.422989	-1.24131	down
Chrysoeriol-6,8-di-C-glucoside-7-O-glucoside	787.22	625.17	786.222	C34H42O21	[M+H]+	Flavonoids	Flavones	-	4.69323e+06	3.83689e+06	3.51528e+06	2.01473e+06	1.6368e+06	1.51482e+06	1.35654e+06	1.28059e+06	1.68168e+06	1.54359e+06	1.48756e+06	1.32456e+06	-	-	1.29343	0.0123404	0.428906	-1.22127	down	1.27142	0.0111126	0.358544	-1.47978	down	1.25029	0.0157192	0.361607	-1.46751	down
Chrysoeriol-7,4'-di-O-glucoside	625.18	301.07	624.169	C28H32O16	[M+H]+	Flavonoids	Flavones	-	227604	227376	283466	110445	136348	116015	128257	125520	111656	156307	134025	129009	-	-	1.29579	0.0116371	0.491312	-1.02529	down	1.2677	0.0162706	0.494868	-1.01488	down	-	-	-	-	-
Chrysoeriol-7-O-(2''-O-glucuronyl)glucuronide	653.13	301.07	652.128	C28H28O18	[M+H]+	Flavonoids	Flavones	-	86300.8	92895.5	77733	50641.5	45903.9	50259.4	32320.8	30825.8	39507.2	35236	28822	44633.5	-	-	-	-	-	-	-	1.27998	0.00138565	0.399541	-1.32358	down	1.21515	0.00148468	0.423041	-1.24113	down
Complanatuside	625.18	301.08	624.169	C28H32O16	[M+H]+	Flavonoids	Flavonols	116183-66-5	222674	219390	208650	80186.2	130610	93219.6	138823	110135	108723	113645	116154	124332	-	-	1.26018	0.0118575	0.467203	-1.09788	down	-	-	-	-	-	-	-	-	-	-
Diosmetin-7-O-Neohesperidoside (Neodiosmin)	609.18	301.08	608.174	C28H32O15	[M+H]+	Flavonoids	Flavones	38665-01-9	1.02213e+06	1.12704e+06	1.28681e+06	596101	725043	395510	595406	419192	978777	496472	285627	322060	-	-	1.188	0.0106839	0.499611	-1.00112	down	-	-	-	-	-	1.215	0.00169794	0.321352	-1.63777	down
Eriodictyol-7-O-(6''-acetyl)glucoside	491.116	287.055	492.127	C23H24O12	[M-H]-	Flavonoids	Flavanones	-	45099.2	53871.2	49815.5	30272.5	30386.9	35827.3	22722.3	22414.5	16530.9	21626.7	19029.4	20688.7	-	-	-	-	-	-	-	1.26202	0.00107217	0.414474	-1.27065	down	1.26003	0.00443299	0.412303	-1.27822	down
Eriodictyol-8-C-glucoside-4'-O-glucoside	611.159	371.077	612.169	C27H32O16	[M-H]-	Flavonoids	Flavanones	-	20010.1	20951.6	19999.6	15906.2	21135.9	16191.6	5614.84	14292.6	8577.12	5719.62	8577.12	11435.6	-	-	-	-	-	-	-	1.09437	0.0491851	0.467256	-1.09771	down	1.16321	0.0164189	0.422109	-1.24431	down
Galangin (3,5,7-Trihydroxyflavone)	269.05	151	270.053	C15H10O5	[M-H]-	Flavonoids	Flavonols	548-83-4	51723.8	51439.9	57720.9	22587.1	29273.8	29718.9	21518.3	21162.3	30656	24594.1	29951.7	27710.9	C10044	ko00941	-	-	-	-	-	1.24478	0.00253895	0.455834	-1.13342	down	-	-	-	-	-
Genkwanin (Apigenin 7-methyl ether)*	285.08	242.06	284.068	C16H12O5	[M+H]+	Flavonoids	Flavones	437-64-9	16112.3	17881.9	15629.6	18434.2	23428.1	8934.79	6299.83	4932.82	11164.3	9042.64	10273.7	6575.85	C10046	-	-	-	-	-	-	1.13265	0.0293328	0.451335	-1.14773	down	-	-	-	-	-
Gossypetin-7-O-(3''-glucosyl)rhamnoside; Rhodioflavonoside	627.16	465.1	626.148	C27H30O17	[M+H]+	Flavonoids	Flavonols	-	3.99986e+06	1.79854e+06	1.57432e+06	1.15005e+06	1.78184e+06	1.34867e+06	5.11113e+06	2.16527e+06	3.19825e+06	3.56385e+06	1.79305e+06	2.46166e+06	-	-	-	-	-	-	-	-	-	-	-	-	-	-	-	-	-
Isorhamnetin-3,7-O-diglucoside	641.17	479.11	640.164	C28H32O17	[M+H]+	Flavonoids	Flavonols	6758-51-6	364218	432881	441052	214457	212362	234902	122520	120550	131623	95294.8	151560	119576	-	-	-	-	-	-	-	1.29691	0.00627369	0.302622	-1.72441	down	1.23884	0.00111719	0.29595	-1.75657	down
Isorhamnetin-3-O-(2''-O-glucosyl)galactoside-7-O-glucoside	803.23	317.06	802.217	C34H42O22	[M+H]+	Flavonoids	Flavonols	-	64615.9	63008	52965	21791.3	47481.8	28127.2	11858.6	11235.5	9083.93	18269	8965.5	12166.8	-	-	-	-	-	-	-	1.29553	0.00378525	0.178184	-2.48856	down	1.22676	0.000726207	0.218182	-2.19639	down
Isorhamnetin-3-O-sophoroside	641.17	317.07	640.164	C28H32O17	[M+H]+	Flavonoids	Flavonols	-	627206	603840	462958	291575	310091	279705	153019	176113	179006	155751	174247	202452	-	-	-	-	-	-	-	1.28438	0.0146033	0.299963	-1.73715	down	1.24589	0.0126338	0.314314	-1.66972	down
Kaempferol-3-O-(2''-O-acetyl)glucoside	491.12	287.05	490.111	C23H22O12	[M+H]+	Flavonoids	Flavonols	-	49245.4	43242.7	44498.5	15459.8	22979.3	26923.9	21157.5	23235.2	23044.4	16692.4	20122	20138.2	-	-	1.22846	0.0076317	0.477149	-1.06749	down	1.29243	0.00279825	0.49229	-1.02242	down	1.2561	0.000641589	0.415754	-1.2662	down
Kaempferol-3-O-(6''-Malonyl)glucoside-7-O-Glucoside	697.16	449.1	696.154	C30H32O19	[M+H]+	Flavonoids	Flavonols	-	88902.1	52562.8	54911.7	133654	85535.6	97624.8	109224	91980.7	97406.1	99951.5	154766	138499	-	-	-	-	-	-	-	-	-	-	-	-	1.08916	0.0352644	2.00236	1.0017	up
Kaempferol-3-O-glucuronide-7-O-glucoside	623.125	285.041	624.133	C27H28O17	[M-H]-	Flavonoids	Flavonols	-	18931.3	16475.6	14818.5	16467.3	20121.9	16698.4	5962.94	11901.9	7789.73	14087.1	7802.74	9107.32	-	-	-	-	-	-	-	-	-	-	-	-	-	-	-	-	-
Kaempferol-3-O-mannoside（Amoenin）	449.11	287.06	448.101	C21H20O11	[M+H]+	Flavonoids	Flavonols	-	1.8698e+07	2.05621e+07	2.1315e+07	1.22283e+07	1.31775e+07	1.09747e+07	9.96493e+06	8.32869e+06	9.39642e+06	3.82184e+06	4.06136e+06	4.49012e+06	-	-	-	-	-	-	-	1.287	0.000745871	0.457119	-1.12936	down	1.26961	0.00138827	0.204264	-2.29149	down
Kaempferol-3-O-sophoroside	609.145	285.039	610.154	C27H30O16	[M-H]-	Flavonoids	Flavonols	19895-95-5	143533	138103	146880	67900.9	100055	92395.3	84629.8	84629.8	57971	71012.4	67313.7	69055.3	C12634	ko00944,ko01110	-	-	-	-	-	-	-	-	-	-	1.27051	0.000253832	0.483953	-1.04706	down
Ladanetin-6-O-β-D-glucoside*	463.13	301.08	462.116	C22H22O11	[M+H]+	Flavonoids	Flavones	-	9.26407e+06	1.19476e+07	1.00934e+07	7.82463e+06	8.63169e+06	6.51521e+06	5.76558e+06	5.70214e+06	4.80314e+06	5.288e+06	4.99496e+06	5.20162e+06	-	-	-	-	-	-	-	-	-	-	-	-	1.24341	0.0208372	0.494635	-1.01556	down
Laricitrin-3-O-xyloside*	465.1	333.07	464.096	C21H20O12	[M+H]+	Flavonoids	Flavonols	-	742799	848824	780218	434709	543352	418565	390733	444774	408389	334489	343406	427617	-	-	-	-	-	-	-	-	-	-	-	-	1.24191	0.000606742	0.466099	-1.10129	down
Limocitrin-3-O-sophoroside	671.18	347.07	670.174	C29H34O18	[M+H]+	Flavonoids	Flavonols	-	2.86482e+06	2.69489e+06	2.82152e+06	2.00866e+06	1.86644e+06	1.82432e+06	1.41164e+06	2.11048e+06	1.56999e+06	1.25347e+06	1.40847e+06	1.47102e+06	-	-	-	-	-	-	-	-	-	-	-	-	1.26055	9.70582e-05	0.493121	-1.01999	down
Luteolin-6,8-di-C-glucoside-7-O-glucoside	773.21	593	772.206	C33H40O21	[M+H]+	Flavonoids	Flavones	-	346164	313802	415256	202033	212996	181063	290341	261221	244209	165187	138250	167768	-	-	-	-	-	-	-	-	-	-	-	-	1.23512	0.0146665	0.43824	-1.19021	down
Myricetin-3-O-galactoside*	481.1	319.06	480.09	C21H20O13	[M+H]+	Flavonoids	Flavonols	15648-86-9	360665	330135	327960	293978	261096	221008	175156	217931	245613	140104	152840	156779	-	-	-	-	-	-	-	-	-	-	-	-	1.26558	0.000660347	0.441443	-1.1797	down
Myricetin-3-O-β-D-glucoside*	481.1	319.04	480.09	C21H20O13	[M+H]+	Flavonoids	Flavonols	19833-12-6	349931	323766	322654	294372	298243	252883	243092	275900	265991	148595	167699	164218	-	-	-	-	-	-	-	-	-	-	-	-	1.26365	0.000222917	0.482272	-1.05208	down
Naringenin chalcone; 2',4,4',6'-Tetrahydroxychalcone	273.08	153.02	272.068	C15H12O5	[M+H]+	Flavonoids	Chalcones	73692-50-9	7691.63	8131.92	7551.16	14566.8	16239.4	14035.5	10968.9	11821.9	10267.4	40809.6	42170.9	47342.3	C06561	ko00941,ko01100,ko01110	-	-	-	-	-	-	-	-	-	-	1.27104	0.00291693	5.57537	2.47907	up
Nobiletin (5,6,7,8,3',4'-Hexamethoxyflavone)	403.14	373.1	402.132	C21H22O8	[M+H]+	Flavonoids	Flavones	478-01-3	6500.14	3355.93	3525.67	4394.54	7463.44	4808.51	6481.08	6841.27	14097	13931.7	12117.4	12497.1	C10112	-	-	-	-	-	-	-	-	-	-	-	1.18514	0.00500854	2.8805	1.52632	up
Okanin-4'-O-glucoside(Marein)*	451.12	289.07	450.116	C21H22O11	[M+H]+	Flavonoids	Chalcones	535-96-6	1.87087e+06	1.58824e+06	1.5125e+06	1.00627e+06	1.05581e+06	986824	1.10334e+06	1.33357e+06	1.20787e+06	741265	626484	1.04556e+06	-	-	-	-	-	-	-	-	-	-	-	-	1.16479	0.00713448	0.485419	-1.0427	down
Patuletin-7-O-gentiobioside	657.17	333.06	656.159	C28H32O18	[M+H]+	Flavonoids	Flavonols	-	813096	595263	568902	357284	510678	365429	286094	285826	285027	280078	283182	320066	-	-	-	-	-	-	-	1.2589	0.0403524	0.433401	-1.20622	down	1.21898	0.0390385	0.446742	-1.16249	down
Pedaliin*	479.12	317.08	478.111	C22H22O12	[M+H]+	Flavonoids	Flavones	22860-72-6	1.42881e+07	1.17517e+07	1.16853e+07	6.56756e+06	7.71948e+06	7.07922e+06	5.6031e+06	5.27088e+06	7.39479e+06	2.67346e+06	2.57364e+06	3.7513e+06	-	-	-	-	-	-	-	1.23719	0.00474869	0.48426	-1.04615	down	1.25118	0.00288713	0.238526	-2.06778	down
Prunetin (5,4'-Dihydroxy-7-methoxyisoflavone)	283.06	268.04	284.068	C16H12O5	[M-H]-	Flavonoids	Isoflavones	552-59-0	59542	9479.04	8448.05	1.12725e+06	1.16227e+06	536703	416066	267066	657644	426251	499297	356873	C10521	-	1.27064	0.0448562	36.482	5.18911	up	1.20018	0.062957	17.3072	4.1133	up	1.18333	0.004576	16.554	4.0491	up
Quercetagetin-7-O-glucoside(Quercetagitrin)*	481.1	319.05	480.09	C21H20O13	[M+H]+	Flavonoids	Flavonols	548-75-4	356371	385333	344942	213061	249422	232696	185181	237254	248831	164515	145411	113696	-	-	-	-	-	-	-	-	-	-	-	-	1.23815	0.000399348	0.389844	-1.35903	down
Quercetin-3,7-Di-O-glucoside	627.14	303.05	626.148	C27H30O17	[M+H]+	Flavonoids	Flavonols	6892-74-6	50646.9	65879.9	62260.5	30920	28248.1	23436.9	20282.5	34134.5	23688.9	18842.8	19788.2	28082.9	-	-	1.28917	0.00927093	0.46203	-1.11394	down	1.20687	0.00580794	0.436865	-1.19474	down	1.22011	0.00421361	0.373147	-1.42218	down
Selagin	317.06	302.04	316.058	C16H12O7	[M+H]+	Flavonoids	Flavones	-	714582	669251	715285	488473	454498	517377	348993	369295	314733	108025	140235	124557	-	-	-	-	-	-	-	1.29099	8.75948e-05	0.492121	-1.02291	down	1.26829	2.9894e-05	0.177607	-2.49324	down
Tamarixetin-3-O-glucoside (Tamarixin)	479.12	317.06	478.111	C22H22O12	[M+H]+	Flavonoids	Flavonols	27542-39-8	1.20452e+07	1.05839e+07	1.01994e+07	8.46524e+06	7.48775e+06	8.08507e+06	5.5656e+06	5.34124e+06	5.74187e+06	3.4817e+06	3.39007e+06	3.89912e+06	-	-	-	-	-	-	-	-	-	-	-	-	1.26443	0.00353333	0.328095	-1.60781	down
Tricin--5,7-O-glucuronicacid*	683.14	331.08	682.138	C29H30O19	[M+H]+	Flavonoids	Flavones	-	702196	557962	510450	235929	215411	226443	264953	298790	211247	211103	161542	202745	-	-	1.31684	0.0231655	0.382797	-1.38535	down	1.23622	0.0165169	0.437697	-1.19199	down	1.24192	0.0153074	0.324968	-1.62163	down
Tricin-4'-O-(2''-Sinapoyl)glucoside-5-O-glucoside*	861.24	331.08	860.237	C40H44O21	[M+H]+	Flavonoids	Flavones	-	1.58475e+06	1.77348e+06	1.74318e+06	848050	938503	888833	666436	650277	728085	695978	758395	796787	-	-	-	-	-	-	-	1.29762	0.00103471	0.40083	-1.31894	down	1.26297	0.000778951	0.441282	-1.18023	down
Tricin-4'-O-(2''-Sinapoyl)glucoside-7-O-glucoside	861.24	331.08	860.237	C40H44O21	[M+H]+	Flavonoids	Flavones	-	1.53326e+06	1.60607e+06	1.47329e+06	871597	829317	690042	542325	710439	775579	674672	530406	620090	-	-	-	-	-	-	-	1.26162	0.00140789	0.439737	-1.18529	down	1.25682	8.7358e-05	0.39569	-1.33756	down
Tricin-4'-O-(Meso-Erythritol)	435.13	331.08	434.121	C21H22O10	[M+H]+	Flavonoids	Flavones	-	418384	441606	460818	223357	198249	289492	176523	153003	172782	155645	175163	135762	-	-	-	-	-	-	-	1.29734	0.000185672	0.380304	-1.39478	down	1.25906	7.27268e-05	0.353246	-1.50125	down
Tricin-4'-O-Benzoic Acid	435.11	331.08	434.1	C24H18O8	[M+H]+	Flavonoids	Flavones	-	602110	517629	544114	372215	355051	352040	239015	174157	301777	305763	292499	278842	-	-	-	-	-	-	-	1.22	0.00332349	0.429695	-1.21862	down	-	-	-	-	-
Tricin-4'-O-Guaicylglycerol	541.17	331.08	540.163	C28H28O11	[M+H]+	Flavonoids	Flavones	-	1.08348e+06	971063	945459	456706	455105	384523	271016	316498	344511	353507	317042	314070	-	-	1.3262	0.00107266	0.432112	-1.21052	down	1.29264	0.0007634	0.310675	-1.68652	down	1.26664	0.00210292	0.328206	-1.60732	down
Tricin-4'-O-guaiacylglycerol-5-O-Feruloyl	703.2	331.08	702.195	C37H34O14	[M+H]+	Flavonoids	Flavones	-	366868	318573	335156	172062	166967	170263	154739	163237	188023	268773	247487	259127	-	-	1.33442	0.00637471	0.499014	-1.00285	down	1.27931	0.000981852	0.495787	-1.01221	down	-	-	-	-	-
Tricin-4'-O-syringylglyceryl ether-5-O-glucoside*	719.21	331.08	718.211	C34H38O17	[M+H]+	Flavonoids	Flavones	-	1.07735e+06	1.05956e+06	1.05075e+06	683810	619747	671931	554375	562124	632089	448661	431588	398510	-	-	-	-	-	-	-	-	-	-	-	-	1.26928	3.48738e-05	0.401159	-1.31775	down
Tricin-4'-O-syringylglyceryl ether-7-O-glucoside*	719.21	331.08	718.211	C34H38O17	[M+H]+	Flavonoids	Flavones	-	1.03579e+06	1.0722e+06	1.19309e+06	659850	671561	677271	539542	565118	589788	463391	441652	453169	-	-	-	-	-	-	-	-	-	-	-	-	1.26679	0.00474767	0.411444	-1.28123	down
Tricin-5-O-(4'-O-Rhamnoside)-guaiacylglycerol-ether	673.21	331.08	672.205	C33H36O15	[M+H]+	Flavonoids	Flavones	-	774297	821474	859813	493311	491836	496968	372009	376011	408661	370216	386077	431065	-	-	-	-	-	-	-	1.29687	0.000737265	0.471041	-1.08608	down	1.25938	0.000269053	0.483534	-1.04831	down
Tricin-5-O-glucoside-7-O-(2''-Sinapoyl)glucoside*	861.24	331.08	860.237	C40H44O21	[M+H]+	Flavonoids	Flavones	-	1.61241e+06	1.89942e+06	1.36561e+06	863541	923456	785469	623304	744861	694801	702712	732941	754495	-	-	-	-	-	-	-	1.26473	0.0215054	0.422961	-1.2414	down	1.23627	0.0274365	0.449037	-1.1551	down
Tricin-5-O-guaiacylglycerol-ether-4'-O-glucoside	689.21	331.08	688.2	C33H36O16	[M+H]+	Flavonoids	Flavones	-	4.08865e+07	4.01148e+07	2.03879e+07	1.37241e+07	1.33236e+07	1.3097e+07	1.01992e+07	1.07013e+07	1.25409e+07	1.00354e+07	9.39488e+06	9.78087e+06	-	-	1.19389	0.0930192	0.395947	-1.33662	down	1.19222	0.0760429	0.329832	-1.6002	down	1.18849	0.0695941	0.288109	-1.79531	down
Tricin-7-O-(2''-O-rhamnosyl)galacturonide	653.17	331.08	652.164	C29H32O17	[M+H]+	Flavonoids	Flavones	89915-54-8	61635.7	54338.3	67632.1	58963.7	47674.7	47659.8	32618	35234.1	23767	33877	31364.2	30109.5	-	-	-	-	-	-	-	1.21654	0.00420909	0.498998	-1.0029	down	-	-	-	-	-
Tricin-7-O-(4'-O-Rhamnoside)-guaiacylglycerol-ether	673.21	331.08	672.205	C33H36O15	[M+H]+	Flavonoids	Flavones	-	832747	848508	820174	447976	429986	489907	449891	398794	405470	398271	375880	405690	-	-	-	-	-	-	-	-	-	-	-	-	1.27038	3.72859e-06	0.471667	-1.08416	down
Tricin-7-O-(Meso-Erythritol)	435.13	331.08	434.121	C21H22O10	[M+H]+	Flavonoids	Flavones	-	497747	433448	447061	209691	200780	196484	127950	150680	145943	151651	147031	177186	-	-	1.33595	0.00442723	0.44038	-1.18318	down	1.29704	0.00157075	0.308051	-1.69876	down	1.26212	0.00101386	0.345268	-1.53421	down
Tricin-7-O-Glucuronide	505.1	329.07	506.106	C23H22O13	[M-H]-	Flavonoids	Flavones	-	77226.2	62994.4	81330.2	26445.7	24448.2	22760.4	25428.9	20955	27914.5	24038	23668.7	24643.5	-	-	1.32645	0.0103442	0.332449	-1.5888	down	1.27731	0.00675395	0.335356	-1.57623	down	1.26082	0.0120833	0.326563	-1.61457	down
Tricin-7-O-glucuronyl(2→1)glucuronide*	683.15	331.08	682.138	C29H30O19	[M+H]+	Flavonoids	Flavones	83097-44-3	615906	654488	571032	255319	222950	221326	166946	157490	256367	144329	189541	193040	-	-	1.33413	0.00103642	0.37992	-1.39623	down	1.26055	0.00063066	0.315409	-1.6647	down	1.25717	0.000282591	0.286142	-1.8052	down
Wogonin (5,7-Dihydroxy-8-Methoxyflavone)	285.08	270.06	284.068	C16H12O5	[M+H]+	Flavonoids	Flavones	632-85-9	19328.6	13891.9	17002.2	31644.8	28904.8	12496.3	7659.83	5251.07	15899.3	6001.65	12002.7	8608.55	C10197	-	-	-	-	-	-	-	-	-	-	-	-	-	-	-	-

## Sheet: Table S2
Compounds	New names flavones
1,4'-Di-Tricin-(guaiacylglycerol)ether
2,4'-Di-Tricin-(guaiacylglycerol)ether
3',5',5,7-Tetrahydroxy-4'-methoxyflavanone-3'-O-glucoside	F1
3'-O-Methyltricetin-5-O-glucoside*
3,4'-Di-Tricin-(guaiacylglycerol)ether
3,5,6,7,8,4'-Hexamethoxyflavone
Datiscetin
Eucalyptin
Acacetin*
Apigenin-6,8-di-C-glucoside-4'-O-glucoside
Chrysoeriol 7-Sophorotrioside
Chrysoeriol-6,8-di-C-glucoside-4'-O-glucoside
Chrysoeriol-6,8-di-C-glucoside-7-O-glucoside
Chrysoeriol-7,4'-di-O-glucoside
Chrysoeriol-7-O-(2''-O-glucuronyl)glucuronide
Neodiosmin
Genkwanin*
Ladanetin-6-O-β-D-glucoside*
Luteolin-6,8-di-C-glucoside-7-O-glucoside
Nobiletin
Pedaliin*
Selagin
Tricin--5,7-O-glucuronicacid*
Tricin-4'-O-(2''-Sinapoyl)glucoside-5-O-glucoside*	F2
Tricin-4'-O-(2''-Sinapoyl)glucoside-7-O-glucoside	F3
Tricin-4'-O-(Meso-Erythritol)
Tricin-4'-O-Benzoic Acid
Tricin-4'-O-Guaicylglycerol
Tricin-4'-O-guaiacylglycerol-5-O-Feruloyl
Tricin-4'-O-syringylglyceryl ether-5-O-glucoside*	F4
Tricin-4'-O-syringylglyceryl ether-7-O-glucoside*	F5
Tricin-5-O-(4'-O-Rhamnoside)-guaiacylglycerol-ether	F6
Tricin-5-O-glucoside-7-O-(2''-Sinapoyl)glucoside*	F7
Tricin-5-O-guaiacylglycerol-ether-4'-O-glucoside	F8
Tricin-7-O-(2''-O-rhamnosyl)galacturonide	F9
Tricin-7-O-(4'-O-Rhamnoside)-guaiacylglycerol-ether	F10
Tricin-7-O-(Meso-Erythritol)
Tricin-7-O-Glucuronide
Tricin-7-O-glucuronyl(2→1)glucuronide*
Wogonin

## Sheet: Table S3
Compounds	New names other flavonoids
2',4'-Dihydroxy-2,3',6'-Trimethoxychalcone*	F11
Pinobanksin*
4-C-Glucose-1,3,6-trihydroxy-7-methoxyxanthone	F12
5,7,4'-Trihydroxy-6,8-dimethoxyisoflavone-7-O-galactoside-glucose-rhamnose	F13
6-Methoxyquercetin-3-O-Xyloside*
7-Hydroxy-2',5,8-Trimethoxyflavanone*
7-O-Methylnaringenin
8,11-dimethoxy-2h-[1,3]dioxolo[4,5-b]xanthen-10-one	F14
Cannabiscitrin*
Complanatuside
Eriodictyol-7-O-(6''-acetyl)glucoside
Eriodictyol-8-C-glucoside-4'-O-glucoside
Galangin
Rhodioflavonoside
Isorhamnetin-3,7-O-diglucoside
Isorhamnetin-3-O-(2''-O-glucosyl)galactoside-7-O-glucoside	F15
Isorhamnetin-3-O-sophoroside
Kaempferol-3-O-(2''-O-acetyl)glucoside
Kaempferol-3-O-(6''-Malonyl)glucoside-7-O-Glucoside	F16
Kaempferol-3-O-glucuronide-7-O-glucoside	F17
Kaempferol-3-O-mannoside
Kaempferol-3-O-sophoroside
Laricitrin-3-O-xyloside*
Limocitrin-3-O-sophoroside
Myricetin-3-O-galactoside*
Myricetin-3-O-β-D-glucoside*
Naringenin chalcone
Marein*
Patuletin-7-O-gentiobioside
Prunetin
Quercetagitrin*
Quercetin-3,7-Di-O-glucoside
Tamarixin
